# Supplementary material for: Serine protease HtrA1 modulates chemotherapy-induced cytotoxicity
Source: JCI journal article supplement (doi:10.1172/jci27698), 2006-06-08
Supplement: sd1 [file 1]

**A**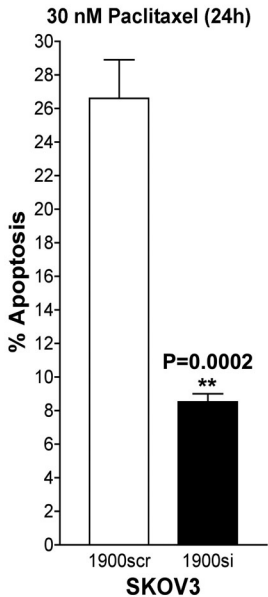**B**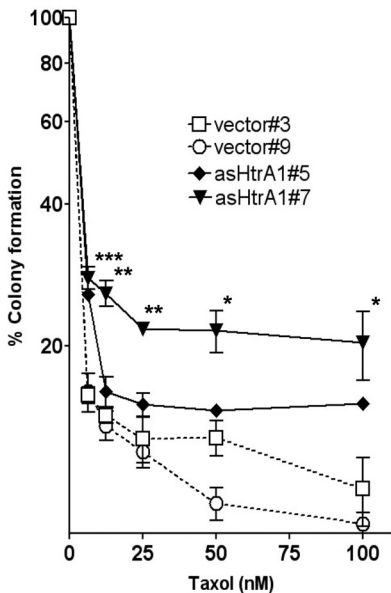

Supp. Fig. 1A-B

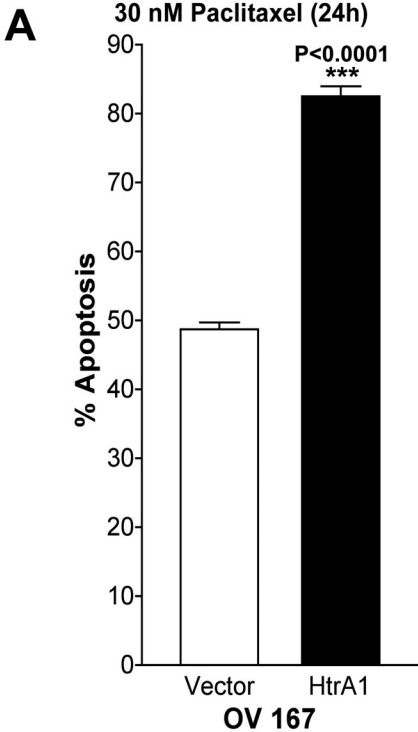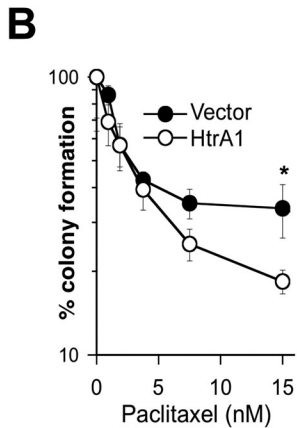

Supp. Fig. 2A-B

**A**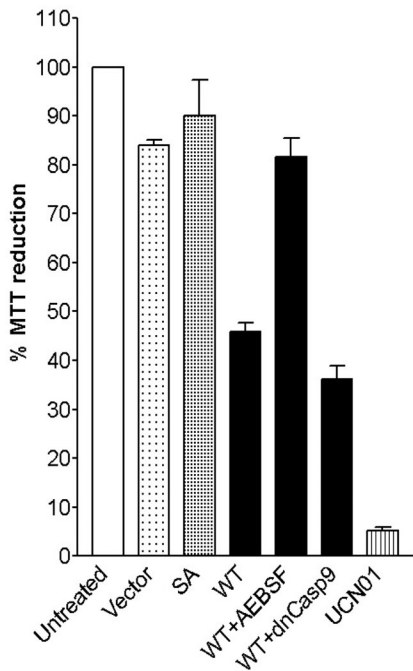**B**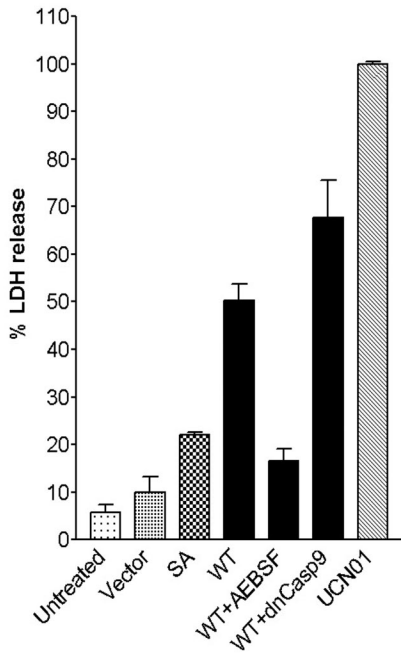**Supp. Fig. 3A-B**

**Supplementary Figure 1.** Suppression of HtrA1 by siRNA attenuates paclitaxel cytotoxicity. **A:** Following HtrA1 suppression by RNAi, cells were treated with 30 nM paclitaxel, and apoptotic cells were counted. These analyses showed a significant attenuation of apoptosis in cells transfected with HtrA1 siRNA (1900si) compared to those transfected with scrambled siRNA (1900scr). **B:** SKOV3 cells lines treated with various concentrations of paclitaxel showed a significant increase in clonogenic survival in anti-sense clones (asHtrA1#5 and #7) compared to vector-expressing clones (vector#3 and #9). Data are expressed as mean  $\pm$  s.e.m and represent three independent trials containing at least triplicates. (\*  $P < 0.05$ , \*\*  $P < 0.001$ , \*\*\*  $P = 0.0001$ , or as indicated;  $\alpha = 0.05$ , unpaired Two-tailed  $t$  test for two groups, and ANOVA followed by Newman-Keuls test for multiple comparison).

**Supplementary Figure 2.** Re-expression of HtrA1 promotes paclitaxel cytotoxicity **A:** HtrA1-transfected OV167 cells showed a significant increase in paclitaxel-induced cell death compared to those cells transfected with empty vector. **B:** OV167 cells stably expressing HtrA1 also showed a significant decrease in clonogenic survival under paclitaxel treatment compared to vector-transfected cells. (\*  $P < 0.05$ , or as indicated;  $\alpha = 0.05$ , unpaired Two-tailed  $t$  test for two groups, and ANOVA followed by Newman-Keuls test for multiple comparison).

**Supplementary Figure 3.** HtrA1-induced cell death is dependent on serine protease activity. Cell death was assessed by MTT reduction assay (A) or lactate dehydrogenase release assay (B). **A-B:** Wild-type HtrA1 (WT $\Delta$ Mac)-transfected cells showed extensive cell death which can be prevented by pre-treatment with 50  $\mu$ g/ml serine protease inhibitor AEBSF but not by co-transfection with dominant negative caspase 9 (dnCasp9). Vector- and protease mutant (SA $\Delta$ Mac)-transfected cells did not show extensive cell death. 20  $\mu$ M UCN-01 treated cells were used as positive controls. Untransfected (Untreated) cells were used as controls and represented 100% survival in MTT reduction assay.
